# Supplementary material for: Sorption Speciation of Nickel(ii) onto Ca-Montmorillonite: Batch, EXAFS Techniques and Modeling
Source: Royal Society of Chemistry journal article supplement (doi:10.1039/c1dt10740b), 2011-01-01
Supplement: c1dt10740b.pdf [file c1dt10740b.pdf]

## Supporting Information on

# Sorption Speciation of Nickel(II) onto Ca-Montmorillonite: Batch, EXAFS Techniques and Modeling

XiaoLi Tan<sup>†\*</sup>, Jun Hu<sup>†</sup>, Gilles Montavon<sup>‡</sup>, XiangKe Wang<sup>†\*</sup>

Key Laboratory of Novel Thin Film Solar Cells, Institute of Plasma Physics, Chinese Academy of Sciences, P.O. Box 1126, Hefei, 230031, P.R. China; and Laboratory SUBATECH, Groupe de Radiochimie, UMR Ecole des Mines/CNRS/Université, 4 rue A. Kastler, BP 20722, 44307 Nantes cedex 03, France

Xiaoli Tan: [tanxl@ipp.ac.cn](mailto:tanxl@ipp.ac.cn)

Jun Hu: [jhu@ipp.ac.cn](mailto:jhu@ipp.ac.cn)

Gilles Montavon: [montavon@subatech.in2p3.fr](mailto:montavon@subatech.in2p3.fr)

Xiangke Wang: [xkwang@ipp.ac.cn](mailto:xkwang@ipp.ac.cn)

\*: Corresponding author. Tel: +86-551-5592788; Fax: +86-551-5591310. Email: [tanxl@ipp.ac.cn](mailto:tanxl@ipp.ac.cn)

(X.L. Tan), [xkwang@ipp.ac.cn](mailto:xkwang@ipp.ac.cn) (X.K. Wang). †: Institute of Plasma Physics; ‡: Laboratory

SUBATECH.

## Figure Captions

**Fig. SI-1** Acid-base titrations of Ca-montmorillonite (5.0 g/L) as a function of pH in 0.001, 0.01 and 0.1 mol/L  $\text{Ca}(\text{NO}_3)_2$  at  $T = 20\text{ }^\circ\text{C}$  (A) and at three different temperatures in 0.001 mol/L  $\text{Ca}(\text{NO}_3)_2$  (B). The lines are calculated using FITEQL 3.2.

**Fig. SI-2** Sorption edges of Ni(II) at different ionic strengths.  $m/V = 0.5\text{ g/L}$ ,  $C_{\text{Ni(II)initial}} = 10\text{ mg/L}$ ,  $T = 20\text{ }^\circ\text{C}$  and  $I = 0.001, 0.01$  and  $0.1\text{ mol/L Ca}(\text{NO}_3)_2$ .

**Fig. SI-3** XANES spectra of the reference and sorption samples at different pH (A) and temperature (B).

**Fig. SI-4** Raw  $k^3$ -weighted  $\chi(k)$  spectra of experimental samples (A) and their corresponding pseudo radial distribution functions (RDFs) (B) at three different temperatures.  $m/V = 0.5\text{ g/L}$ ,  $C_{\text{Ni(II)initial}} = 10\text{ mg/L}$ ,  $\text{pH} = 7.5$ ,  $T = 20, 40$  and  $60\text{ }^\circ\text{C}$ ,  $I = 0.001\text{ mol/L}$ .

**Acid-base Titration of Ca-montmorillonite.** Potentiometric titration of Ca-montmorillonite suspensions (5.0 g/L) were performed over a wide range of pH (3.2-10.6) to measure proton sorption/desorption as a function of pH and ionic strength (0.1, 0.01, and 0.001 mol/L  $\text{Ca}(\text{NO}_3)_2$ ) at 20 °C with a Mettler-Toledo DL 50 Automatic Titrator. Before the titration, the suspensions were titrated up to pH ~3 quickly with 1 mol/L  $\text{HNO}_3$  and purged with argon gas for about 1 h. Then the titration was carried out from pH ~3 to pH ~10.5 by using 0.0911 mol/L NaOH.

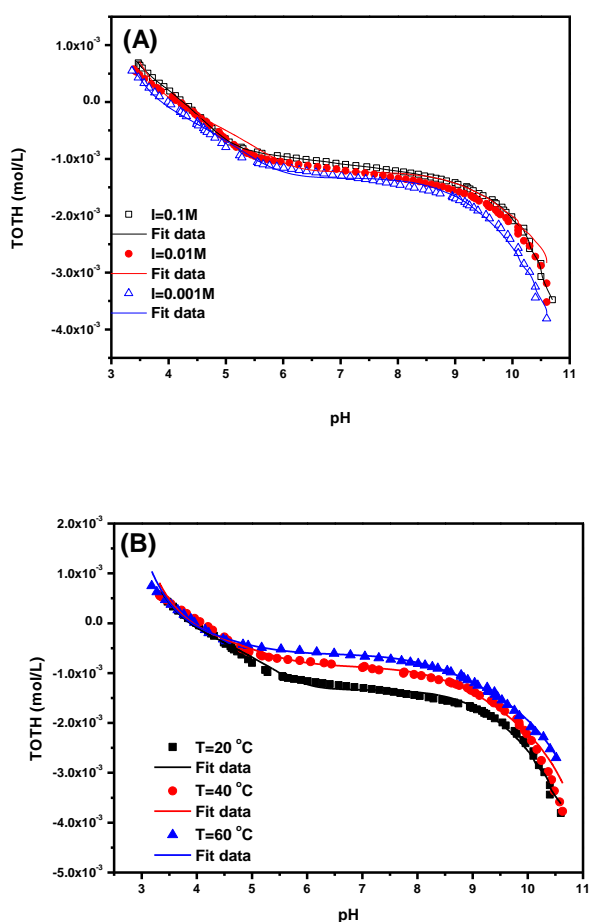

**Fig. SI-1** Acid-base titrations of Ca-montmorillonite (5.0 g/L) as a function of pH in 0.001, 0.01 and 0.1 mol/L  $\text{Ca}(\text{NO}_3)_2$  at  $T = 20$  °C (A) and at three different temperatures in 0.001 mol/L  $\text{Ca}(\text{NO}_3)_2$  (B). The lines are calculated using FITEQL 3.2.

**Table SI-1** Surface site concentration and intrinsic surface complexation constants of Ca-

montmorillonite calculated by FITEQL 3.2.  $C_{\text{Solid}} = 5.0 \text{ g/L}$ ,  $\text{BET} = 64.4 \text{ m}^2/\text{g}$ ,  $N_{\text{X}_2\text{Ca}} = 110$   
 $\text{mmol}/100\text{g}$ ,  $T = 20 \text{ }^\circ\text{C}$ .

| Ionic strength | Site                | Density (mol/g)       | Reaction                                                                                     | logK  |
|----------------|---------------------|-----------------------|----------------------------------------------------------------------------------------------|-------|
| 0.001mol/L     | $\equiv\text{AlOH}$ | $3.11 \times 10^{-4}$ | $\equiv\text{AlOH} + \text{H}^+ \leftrightarrow \equiv\text{AlOH}_2^+$                       | 4.40  |
|                |                     |                       | $\equiv\text{AlOH} \leftrightarrow \equiv\text{AlO}^- + \text{H}^+$                          | -4.83 |
|                | $\equiv\text{SiOH}$ | $2.43 \times 10^{-4}$ | $\equiv\text{SiOH} \leftrightarrow \equiv\text{SiO}^- + \text{H}^+$                          | -4.92 |
|                |                     |                       | $\equiv\text{X}_2\text{Ca} + 2\text{H}^+ \leftrightarrow \equiv 2\text{XH} + \text{Ca}^{2+}$ | 2.46  |
|                |                     | WSOS/DF               |                                                                                              | 15.12 |
| 0.01mol/L      | $\equiv\text{AlOH}$ | $2.96 \times 10^{-4}$ | $\equiv\text{AlOH} + \text{H}^+ \leftrightarrow \equiv\text{AlOH}_2^+$                       | 3.21  |
|                |                     |                       | $\equiv\text{AlOH} \leftrightarrow \equiv\text{AlO}^- + \text{H}^+$                          | -5.86 |
|                | $\equiv\text{SiOH}$ | $2.36 \times 10^{-4}$ | $\equiv\text{SiOH} \leftrightarrow \equiv\text{SiO}^- + \text{H}^+$                          | -1.99 |
|                |                     |                       | $\equiv\text{X}_2\text{Ca} + 2\text{H}^+ \leftrightarrow \equiv 2\text{XH} + \text{Ca}^{2+}$ | 4.98  |
|                |                     | WSOS/DF               |                                                                                              | 19.09 |
| 0.1mol/L       | $\equiv\text{AlOH}$ | $3.56 \times 10^{-4}$ | $\equiv\text{AlOH} + \text{H}^+ \leftrightarrow \equiv\text{AlOH}_2^+$                       | 2.66  |
|                |                     |                       | $\equiv\text{AlOH} \leftrightarrow \equiv\text{AlO}^- + \text{H}^+$                          | -7.02 |
|                | $\equiv\text{SiOH}$ | $2.19 \times 10^{-4}$ | $\equiv\text{SiOH} \leftrightarrow \equiv\text{SiO}^- + \text{H}^+$                          | -1.98 |
|                |                     |                       | $\equiv\text{X}_2\text{Ca} + 2\text{H}^+ \leftrightarrow \equiv 2\text{XH} + \text{Ca}^{2+}$ | 4.88  |
|                |                     | WSOS/DF               |                                                                                              | 16.63 |

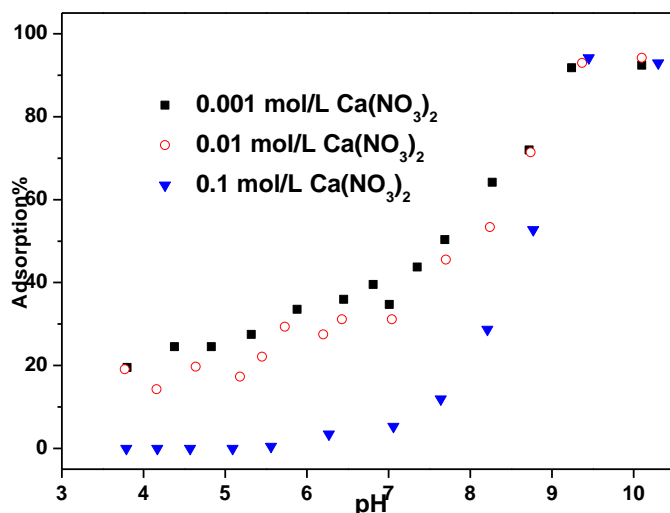

**Fig. SI-2** Sorption edges of Ni(II) at different ionic strengths.  $m/V = 0.5$  g/L,  $C_{\text{Ni(II)initial}} = 10$  mg/L,  $T = 20$  °C and  $I = 0.001, 0.01$  and  $0.1$  mol/L  $\text{Ca}(\text{NO}_3)_2$ .

From the ionic strength dependence, one can deduce that cation exchange is the main mechanism for Ni(II) sorption on Ca-montmorillonite at  $\text{pH} < 7$ , which is also supported by the very slow increase of Ni(II) sorption at this pH range. This is consistent with increased sorption on the permanent charge sites with decreasing  $\text{Ca}^{2+}$  concentration. The ionic strength-dependent sorption suggests that  $\text{Ni}^{2+}$  exchange reaction on permanent charge sites is the predominant sorption process at the lowest  $\text{Na}^+$  concentration. The results of Ni(II) sorption are similar to that found and described previously for Cu(II) sorption as a function of pH and  $\text{Na}^+$  concentrations.<sup>1</sup> It was reported that an increase in  $\text{Na}^+$  concentration results in a displacement of metal ions from the interlayer sites and a shift in metal ions sorption from the interlayer to the edge sites.

**Sample Preparation for EXAFS Analysis.** Ni(II) sorption samples were prepared by adding  $\text{Ni}^{2+}$  (in the form of  $\text{Ni}(\text{NO}_3)_2$  solution) to freshly prepared Ca-montmorillonite suspensions. The initial Ni(II) concentration (10 mg/L) and the reaction pH were chosen to achieve high Ni(II) loading on Ca-montmorillonite while avoiding that the bulk solutions were undersaturated with respect to crystalline  $\text{Ni}(\text{OH})_2(\text{s})$ .<sup>2,3</sup> The samples were shaken end-over-end for 2 weeks. Samples

for EXAFS measurements were prepared from the residual wet pastes obtained after centrifugation of the suspensions. Samples preparation and equilibration steps were carried out in a glove box under N<sub>2</sub> atmosphere (CO<sub>2</sub> < 5 ppm, and O<sub>2</sub> < 5 ppm).

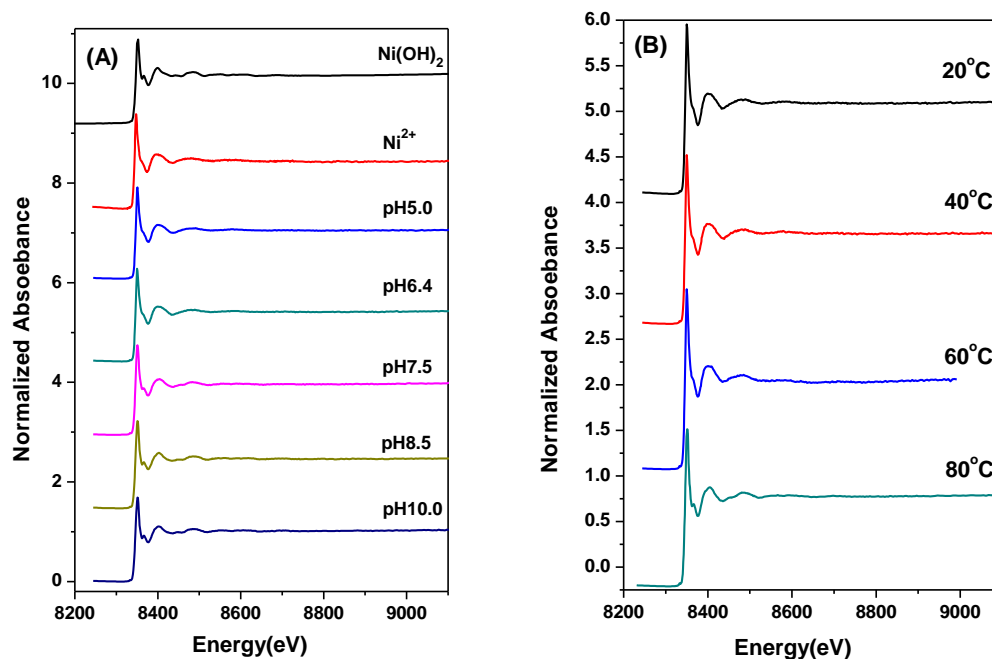

**Fig. SI-3** XANES spectra of the reference and sorption samples at different pH (A) and temperature (B).

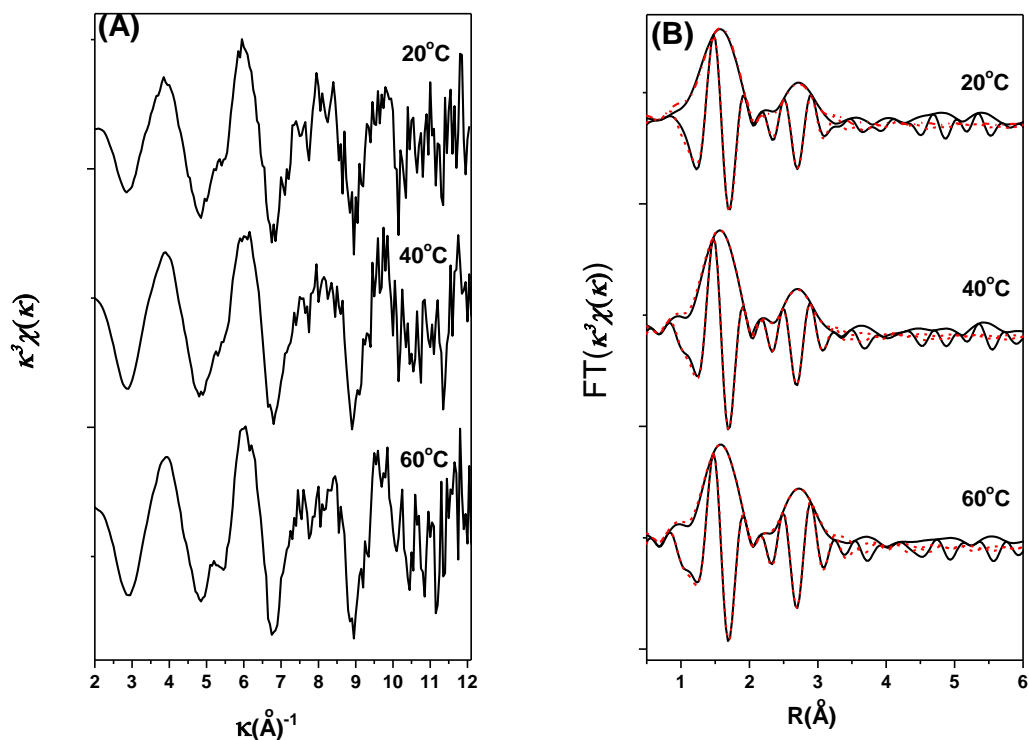

**Fig. SI-4** Raw  $k^3$ -weighted  $\chi(k)$  spectra of experimental samples (A) and their corresponding pseudo radial distribution functions (RDFs) (B) at three different temperatures.  $m/V = 0.5$  g/L,  $C_{\text{Ni(II)initial}} = 10$  mg/L,  $\text{pH} = 7.5$ ,  $T = 20, 40$  and  $60$  °C,  $I = 0.001$  mol/L.

### Literature Cited

- 1 Morton, J.D.; Semrau, J.D.; Hayes, K.F. An X-ray absorption spectroscopy study of the structure and reversibility of copper adsorbed to montmorillonite clay. *Geochim. Cosmochim. Acta* **2001**, *65*, 2709-2722.
- 2 Dähn, R.; Scheidegger, A.M.; Manceau, A.; Schlegel, M.L.; Baeyens, B.; Bradbury, M.H.; Chateigner, D. Structural evidence for the sorption of Ni(II) atoms on the edges of montmorillonite clay minerals: a polarized X-ray absorption fine structure study. *Geochim. Cosmochim. Acta* **2003**, *67*, 1-15.
- 3 Dähn, R.; Scheidegger, A.M.; Manceau, A.; Schlegel, M.L.; Baeyens, B.; Bradbury, M.H.; Morales, M. Neof ormation of Ni phyllosilicate upon Ni uptake on montmorillonite: a kinetics study by powder and polarized extended X-ray absorption fine structure spectroscopy. *Geochim.*

*Cosmochim. Acta* **2002**, *66*, 2335-2347.
